# Supplementary material for: Cdk1 activity acts as a quantitative platform for coordinating cell cycle progression with periodic transcription
Source: PubMed Central journal article supplement (PMC4822045; doi:10.1038/ncomms11161), 2016-04-05
Supplement: ncomms11161-s1.pdf [file ncomms11161-s1.pdf]

## Supplementary Figure 1

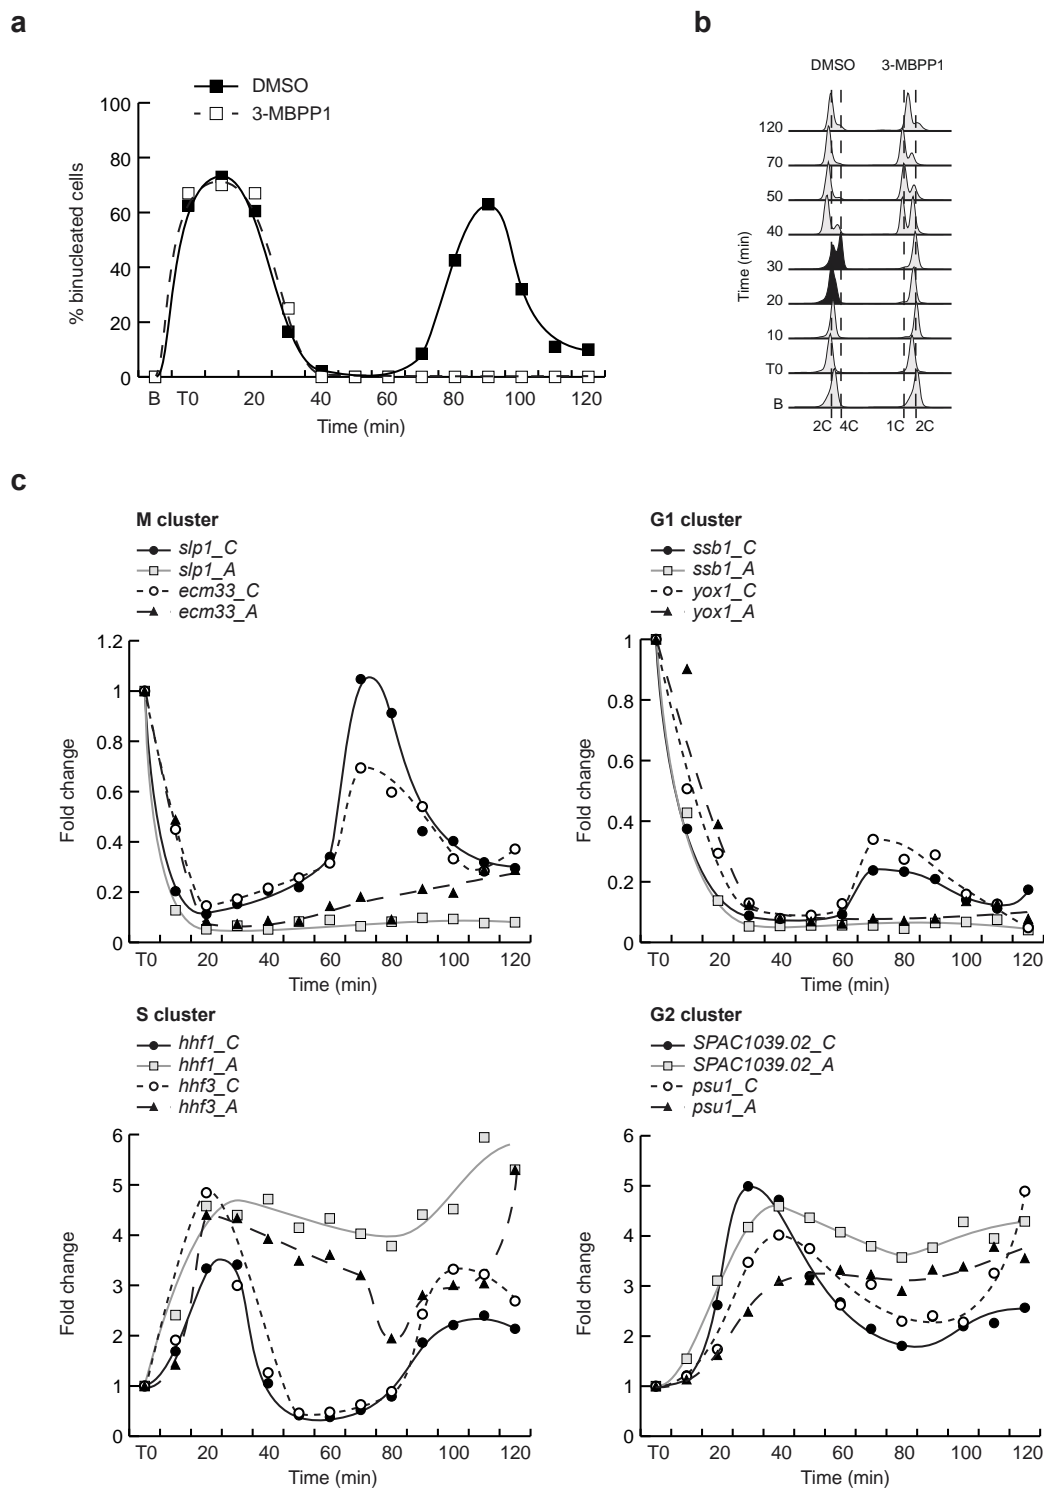

### Supplementary Figure 1. Periodic transcription in G1-arrested fission yeast cells

Cells were treated as in Figure 1a. **a.** Percentage of binucleated cells. Both control and inhibitor-treated cells initially undergo mitosis. However, cells subsequently treated with inhibitor at T0 remain blocked in G1 (see b) and do not progress to the next mitosis.  $n > 100$  at each time point. Note that differences in the duration of the wash during these experiments can induce negligible variations in the timing of the first peak of binucleated cells (compare with Fig. 1b). **b.** DNA content analysis of cells in a. While control cells progress through S phase (black profile) and cytokinesis, inhibitor-treated cells accumulate in G1 prior to S phase with a 1C DNA content (see Methods section for the interpretation of flow cytometry profiles in fission yeast). **c.** Changes in gene expression for the indicated genes in a. C and A refer to cycling (DMSO-treated) and arrested (inhibitor-treated) cells, respectively. Fold changes are normalised to actin RNA levels and represented relative to the values at T0 (set to 1). Consistent with our model, the periodicity of the G2 genes is lost in inhibitor-treated cells, although we observe an initial increase in transcription that is not detected with *spd1* (Fig. 1; this may result from different levels of sensitivity to Cdk1 activity).

# Supplementary Figure 2

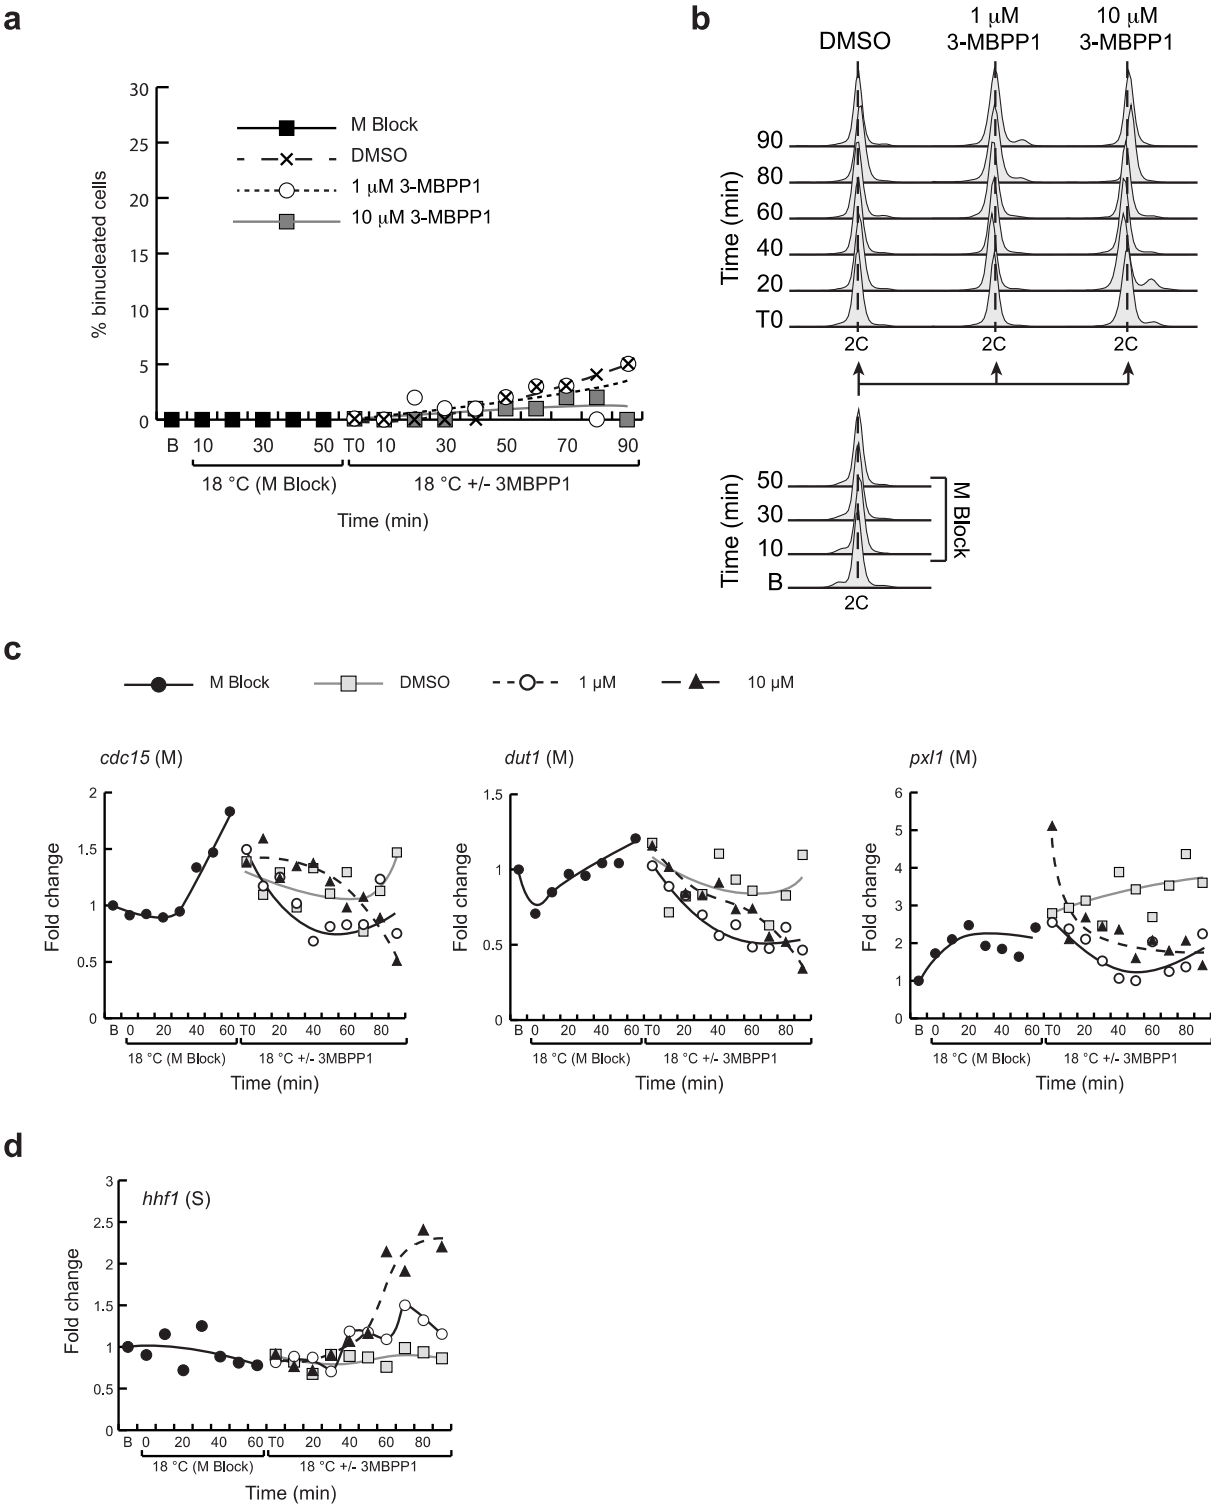

**Supplementary Figure 2. Periodic transcription and Cdk1 activity levels**

**a.** Percentage of binucleated cells for the experiments in Fig. 4.  $n > 100$  at each time point. **b.** DNA content analysis for the experiments in Fig. 4. In control and inhibitor-treated cultures, cells remain blocked in mitosis without changes in DNA content. **c, d.** Changes in expression of the indicated genes as in Fig. 4. Fold changes are normalised to actin RNA levels and represented relative to the values at B (set to 1, see Fig. 4a). Legends in *d* are as in *c*.

## Supplementary Figure 3

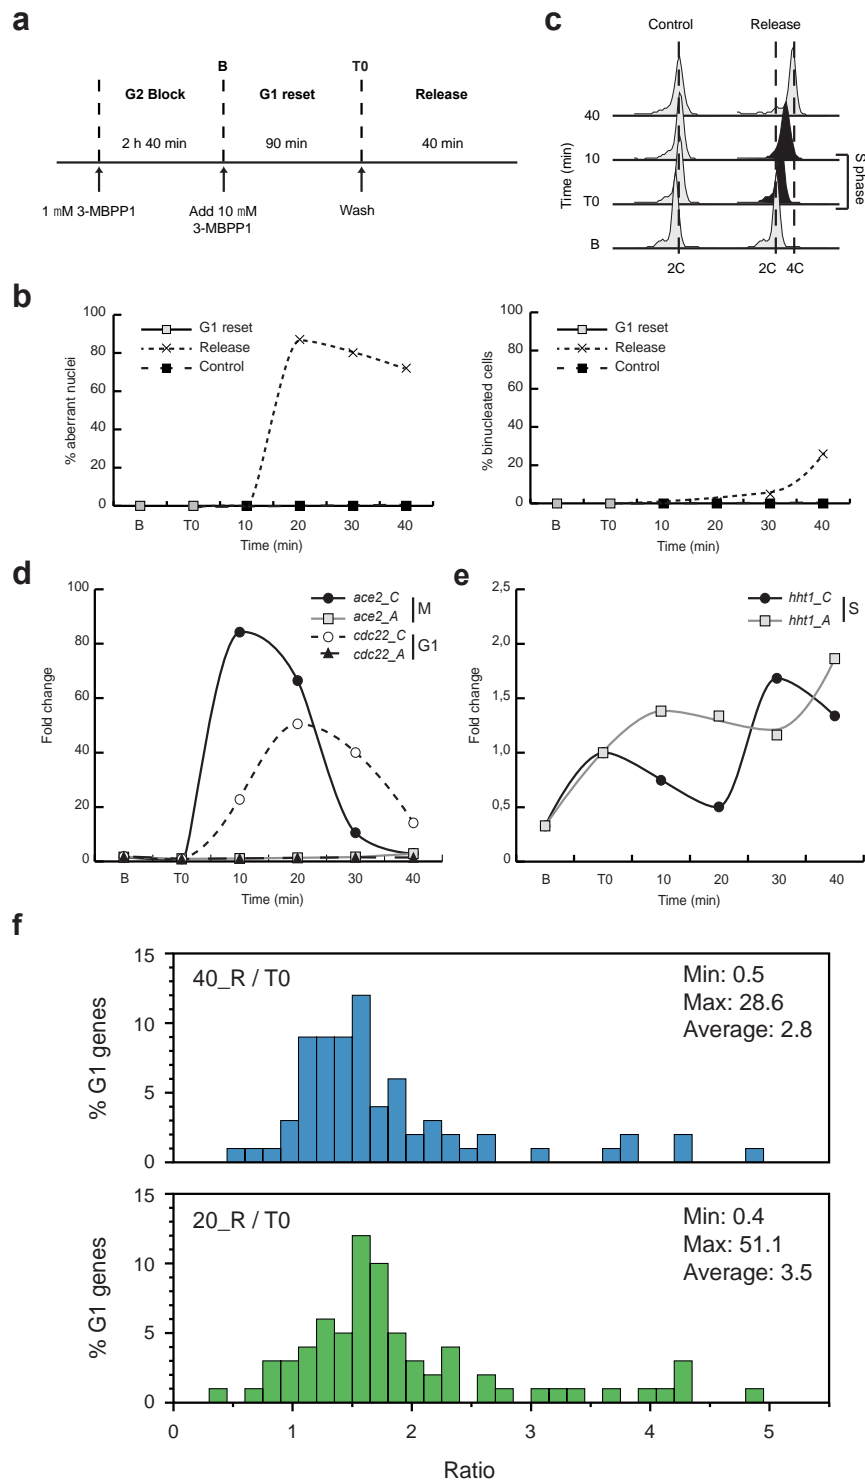

### Supplementary Figure 3. Interplay between cell cycle transitions and periodic transcription

**a.** Schematic representation of the experimental procedure. Inhibitor-sensitive minimal cells were synchronised in G2 by addition of 1  $\mu$ M 3-MBPP1 for 2 h 40 min. The cultures were then treated with 10  $\mu$ M 3-MBPP1 for 90 min to induce a G1-reset without an intervening mitosis<sup>1</sup>. Subsequent release from the high inhibitor block at T0 (culture washed with DMSO-containing medium, as compared with control cells maintained in 10  $\mu$ M 3-MBPP1) induces overlapping S and M phases<sup>1</sup>. Samples were collected at the indicated time points for assessing changes in gene transcription. **b.** Percentages of aberrant nuclei (left panel) and binucleated cells (right panel) as in Fig. 6.  $n > 100$  at each time point. **c.** DNA content analysis of cells in *a*. Released cells undergo rapid re-replication (black profiles) while the control, blocked cells remain in a G1-like phase with a 2C DNA content. **d, e.** Changes in gene expression for the indicated genes during the release in *a*. *R* and *A* refer to released (DMSO-washed) and arrested (maintained in 10  $\mu$ M inhibitor after T0) cells, respectively. Fold changes are normalised to actin RNA levels and represented relative to the values at T0 (set to 1). **f.** Distribution of the expression ratios (20\_R/T0 and 40\_R/T0) for the G1 genes from Fig. 6f. For viewing purposes, genes with ratios over 5 are excluded from the histograms (9 out of 81 genes for each time point). Minimal, maximal and average values are indicated. Histogram steps are 0.15.

## Supplementary Tables

**Supplementary Table 1. Differences in periodic gene expression between cycling and G2-arrested cells**

|           |               | 1.5 cut-off |           |           | 1.15 cut-off |           |           |
|-----------|---------------|-------------|-----------|-----------|--------------|-----------|-----------|
|           |               | 20_C/20_A   | 60_C/60_A | 20_A/60_A | 20_C/20_A    | 60_C/60_A | 20_A/60_A |
| <b>M</b>  | <b>High</b>   | 53          | 53        | 44        | 82           | 78        | 91        |
|           | <b>Medium</b> | 9           | 20        | 24        | 22           | 44        | 71        |
|           | <b>Low</b>    | 4           | 18        | 24        | 26           | 47        | 64        |
| <b>G1</b> | <b>High</b>   | 0           | 74        | 37        | 15           | 89        | 85        |
|           | <b>Medium</b> | 0           | 48        | 22        | 4            | 81        | 59        |
|           | <b>Low</b>    | 0           | 26        | 15        | 8            | 74        | 41        |
| <b>S</b>  | <b>High</b>   | 0           | 92        | 8         | 0            | 100       | 54        |
|           | <b>Medium</b> | 0           | 62        | 8         | 8            | 92        | 31        |
|           | <b>Low</b>    | 0           | 23        | 8         | 0            | 62        | 38        |
| <b>G2</b> | <b>High</b>   | 0           | 10        | 2         | 2            | 33        | 19        |
|           | <b>Medium</b> | 0           | 8         | 4         | 2            | 19        | 40        |
|           | <b>Low</b>    | 0           | 3         | 2         | 2            | 22        | 17        |

Percentages of genes above the indicated cut-offs. High, medium and low refer to the groups of induction amplitudes in Fig. 2g.

**Supplementary Table 2. Changes in periodic gene expression in cells undergoing simultaneous S and M**

|           | 1.5 cut-off |         |
|-----------|-------------|---------|
|           | 20 / T0     | 40 / T0 |
| <b>M</b>  | 64          | 23      |
| <b>G1</b> | 71          | 60      |
| <b>S</b>  | 44          | 69      |
| <b>G2</b> | 12          | 12      |

Percentages of genes above the 1.5 cut-off in Fig. 6f.

**Supplementary Table 3. Primers used in this study**

| Primer name           | Sequence                         |
|-----------------------|----------------------------------|
| <i>act1RTF</i>        | CCCAAATCCAACCGTGAGAAG            |
| <i>act1RTR</i>        | TGTGGGTAACACCATCACCAGAG          |
| <i>ace2RTF</i>        | CCTCCTTTGATGCTTCCTTATCAC         |
| <i>ace2RTR</i>        | TGTTGAGAGTTGGTCAAGGAAAATG        |
| <i>slp1RTF</i>        | GAGTTGGTTGTCTCTCCTGGAATC         |
| <i>slp1RTR</i>        | CACTAGAGTGTCCCTGAAGAGTCCC        |
| <i>cdc15RTF</i>       | TCTCATAATGCCGAGACTGAG            |
| <i>cdc15RTR</i>       | GTAGCAGTAGGTTGAAGTTGAC           |
| <i>ecm33RTF</i>       | GTAAACTTTCTAACGTTACCACTG         |
| <i>ecm33RTR</i>       | GTGTTAGAGAAATACAAGTTACCAG        |
| <i>dut1RTF</i>        | CTGAATGTATAGTTCCAAGAAGAG         |
| <i>dut1RTR</i>        | GCGCCAGTGTCAATGCTATG             |
| <i>cdc18RTF</i>       | CCGTCCTATAATTCTACTGCCAAATTG      |
| <i>cdc18RTR</i>       | TTGACGAAAGAAAGATTCCACAATTG       |
| <i>cdc22RTF</i>       | CTAAACACGGAATTTCGTAATTCCTTTGTTAG |
| <i>cdc22RTR</i>       | GTTAGAAGTATATGGCTCAAACACTCATTG   |
| <i>ams2RTF</i>        | CCTGTCAACATAAACGGTCTTTC          |
| <i>ams2RTR</i>        | CATGGAACAAAGAATCTAACTCAAG        |
| <i>eng1RTF</i>        | GTCTATCTGGTGATTCCCTTGGC          |
| <i>eng1RTR</i>        | TTAACCCATTCTTATTGTTCCCAG         |
| <i>hht1RTF</i>        | GGAGGTGTTAAGAAGCCTCATCG          |
| <i>hht1RTR</i>        | ACCAAACGTTGGAAAGGTAGCTTAC        |
| <i>hta1RTF</i>        | GCCGCCGTTTTGGAATATTTG            |
| <i>hta1RTR</i>        | GCGAGTTGAAGATGACGGG              |
| <i>hhf1RTF</i>        | GCTAAGCGTCACCGTAAAATTC           |
| <i>hhf1RTR</i>        | GCTTGAGAACAGCACGAGTC             |
| <i>spd1RTF</i>        | CATTCAAGGCTCCTTAATGGACG          |
| <i>spd1RTR</i>        | GTGTTGTAAAGCGGTGGGTTATAGG        |
| <i>hhf3RTF</i>        | CAAGGTATTACTAAGCCTGCC            |
| <i>hhf3RTR</i>        | GCTTGGCATGCTCAGTATAG             |
| <i>SPAC1039.02RTF</i> | CTCTTCGCAACGTTAACGATTATC         |
| <i>SPAC1039.02RTR</i> | GGTATGGACGGTGTTCATCGC            |
| <i>psu1RTF</i>        | CTTCTGCTCAATACTATGTAAACAAG       |
| <i>psu1RTR</i>        | CATACCGGCACCAAAGACAAG            |
| <i>ssb1RTF</i>        | CCTCAATACCGTTATATTATAACTATTG     |
| <i>ssb1RTR</i>        | CGACGTCGTCAAAGACGTTG             |
| <i>yox1RTF</i>        | GCGAAACTTCTACAGGACAGG            |
| <i>yox1RTR</i>        | ATGAATCATTTGCCTACGACAG           |

**Supplementary Reference**

1. Coudreuse, D. & Nurse, P. Driving the cell cycle with a minimal CDK control network. *Nature* **468**, 1074–1079 (2010).
